# Supplementary material for: Synergism between Hydramethylnon and Metarhizium anisopliae and Their Influence on the Gut Microbiome of Blattella germanica (L.)
Source: MDPI journal article supplement (doi:10.3390/insects11080538), 2020-08-15
Supplement: s1 [file s1]

## Supplementary

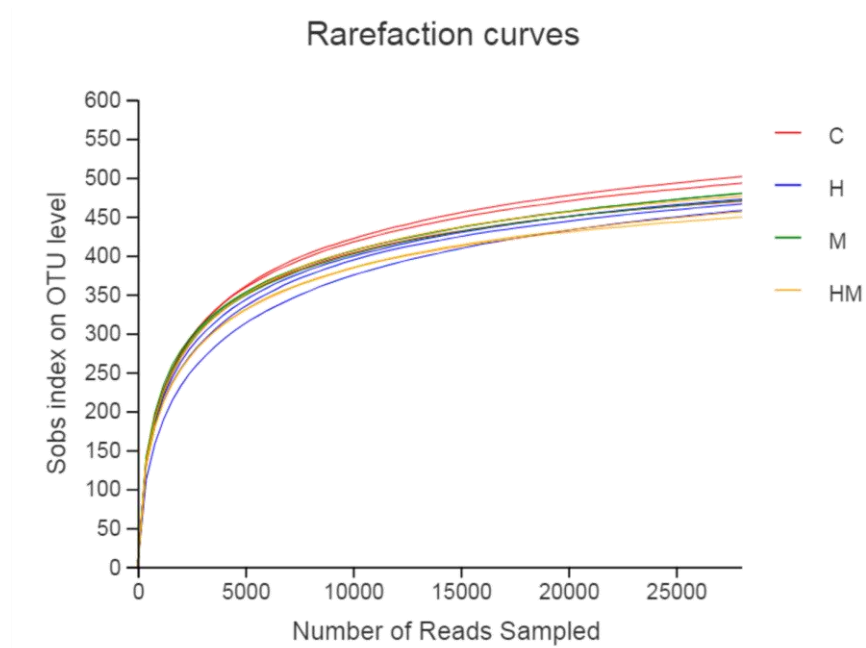

**Figure 1.** Rarefaction analysis of the different samples. Rarefaction curves of OTUs clustered at the 97% phylotype similarity level. Sobs represents the observed number of species. H, hydramethylnon sample; M, *M. anisopliae* sample; HM, hydramethylnon and *M. anisopliae* sample; C, control sample.
